# Supplementary material
Source: PubMed Central journal article supplement (PMC4070375)
Supplement: NIHMS582649-supplement-supplement_1.pdf [file NIHMS582649-supplement-supplement_1.pdf]

## Material and Methods

**FHS Participants.** As previously described<sup>1</sup>, 1819 participants of the FHS Offspring Cohort 8 underwent physical examination. Individuals were categorized as hypertensive if they had systolic blood pressure  $\geq 140$  mm Hg, diastolic blood pressure  $\geq 90$  mm Hg, or received treatment for hypertension. Individuals were considered diabetic if they had fasting blood glucose  $\geq 126$  mg/dL, non-fasting blood glucose  $\geq 200$  mg/dL, or treatment with insulin or hypoglycemic drugs. Finally, individuals were considered smokers if they smoked at least 1 cigarette a day in the year prior to examination<sup>1</sup>. The FHS protocol was approved by the Boston University Medical Center and the University of Massachusetts Medical School Institutional Review Boards and all participants signed informed consent.

**Cell Culture.** Meg-01 cells, a human megakaryoblast cell line (ATCC; CRL-2021), were cultured as previously described<sup>2</sup>.

**Mice.** C57BL/6J (#000664), IL1R1<sup>-/-</sup> (B6.129S7-II1r1<sup>tm1Imx</sup>/J; #003245), and IL1 $\beta$ <sup>-/-</sup> (B6.129P2-P2rx7<sup>tm1Gab</sup>/J; #005576) mice were purchased from Jackson Laboratories. Mice were maintained at Boston University School of Medicine. All studies were approved by the university's Institutional Animal Care and Use Committee. Mice were fed *ad libitum* a high fat diet (Bio-Serv; F3282) for up to 10 weeks.

**Flow Cytometry.** Intact human platelets and Meg-01 cells were stained with anti-human IL1R1 FITC conjugated antibodies or isotype controls (R&D Systems; FAB269F) and analyzed on a FACSCalibur flow cytometer using Cell Quest Software (BD Biosciences). For heterotypic aggregates, human whole blood was diluted with 1X PBS and then left untreated (resting) or treated with 10  $\mu$ g/mL Pam3CSK4 (InvivoGen; tlrl-pms) or 10 ng/mL IL1 $\beta$  (R&D Systems; 201-LB) for 10 minutes at 37°C, while stirring at 1200 rpm. Samples were then dual-stained with anti-human CD41 FITC conjugated antibodies and anti-human CD14 PE-Cy7 conjugated antibodies, or corresponding isotype controls (eBiosciences; 11-0419 and 25-0149, respectively) then analyzed by flow cytometry gating for neutrophils and measuring the percent that were positive for platelets<sup>3</sup>. For heterotypic aggregates in mice, whole blood was diluted with 1X PBS and then left untreated (resting) or treated with 10 ng/mL IL1 $\beta$  (R&D Systems; 401-ML) for 10 minutes at 37°C, while stirring at 1200 rpm. Samples were then stained with anti-mouse CD41 FITC conjugated antibodies and anti-mouse Ly6G PE-Cy7 conjugated antibodies, or corresponding isotype controls (eBioscience; 11-0411 and 25-5931, respectively). Analysis was done by flow cytometry as described above.

**Western Blot Analysis.** Western blots were run as previously described<sup>2</sup> and analyzed using ImageJ (NIH).

**Ploidy.** Bone marrow was isolated from C57BL/6J and IL1R1<sup>-/-</sup> mice as previously described<sup>2</sup>. Cells were treated daily with vehicle, 50 ng/mL mouse TPO (R&D Systems; 488-TPO), or 25 ng/mL IL1 $\beta$  for 3 days. Megakaryocyte ploidy was measured as previously described<sup>2</sup>.

**Meg-01 Adhesion.** Meg-01 cells, treated with 25 ng/mL IL1 $\beta$ , were allowed to adhere to either fibronectin (10  $\mu$ g/mL; Sigma; F0895) or fibrinogen (10  $\mu$ g/mL; Enzyme Research Laboratories; FIB 3) for 1 h. The number of adherent cells was determined as previously described<sup>2</sup>.

**Gene Expression.** Meg-01 cells were pretreated with DMSO, 50  $\mu$ M LY294002 (Calbiochem; 440204), 50  $\mu$ M U0126 (Enzo; BML-EI282), or 50  $\mu$ M BAY11-7082 (Calbiochem; 196870) for 30 minutes, then treated with 25 ng/mL IL1 $\beta$  for 3 h at 37°C. Total RNA was isolated using RNeasy Mini Kit (Qiagen) and converted to cDNA using the High-Capacity cDNA Reverse Transcription Kit (Applied Biosystems). Gene expression of GAPDH, COX2, MCP-1, NF $\kappa$ B1, IL1R1, IL1 $\beta$ , TLR2, CD41, and GP1b (Primers, probes from Applied Biosystems) was determined using TaqMan® Gene Expression Master Mix (Applied Biosystems) on an Applied Biosystems 7900 HT Fast Real-Time PCR System with SDS 2.2.2 Software.

Platelet RNA from FHS participants or mice was isolated using miRNeasy Mini Spin Columns (Qiagen). RNA was converted to cDNA as previously described. Pre-amplification was

performed using TaqMan® PreAmp Master Mix (Applied Biosystems), followed by real-time PCR using the BioMark™ System (Fluidigm, San Francisco, CA). The primers and probes were from Applied Biosystems.

**Washed Platelet Aggregation.** Human and mouse platelets were isolated from citrated whole blood as previously described<sup>3</sup>. Human protocols were approved by Boston University School of Medicine and the University of Massachusetts Medical School Institutional Review Boards. All donors signed informed consent. Platelets ( $2 \times 10^8$ /mL), resuspended in a HEPES buffer (140 mM NaCl, 6 mM KCl, 2.4 mM  $\text{MgSO}_4 \cdot 7\text{H}_2\text{O}$ , 1.7 mM  $\text{Na}_2\text{HPO}_4$ , 6 mM Na HEPES, 0.35% BSA, 0.1% Dextrose, pH 7.4), were pretreated with 10 ng/mL IL1 $\beta$  in the presence of 1 mM  $\text{CaCl}_2$ , 2 mM  $\text{MgCl}_2$ , and 0.3  $\mu\text{M}$  fibrinogen for 10 minutes at 37°C and then left untreated (Resting) or treated with either  $\alpha$ -thrombin (human or mouse; Enzyme Research Laboratories; HT1002a and MIIa, respectively) or 10  $\mu\text{g}/\text{mL}$  collagen (Chrono-Log; 385) for 10 minutes, at 37°C, while stirring at 1200 rpm. Percent aggregation was determined using a lumi-aggregometer (Bio/Data). Platelets were pretreated with SB203580 (0.2  $\mu\text{M}$ ; Enzo; BML-EI286), a p38 inhibitor, or vehicle (DMSO) for 5 minutes, prior to the addition of IL1 $\beta$ .

**Platelet Adhesion.** Human and mouse platelets were isolated as described above.  $2 \times 10^8$ /mL platelets ( $2 \times 10^6$ /mL for the mouse high fat diet studies), resuspended in HEPES buffer, were stained with calcein-AM (Invitrogen). Samples were left untreated (Resting), treated for 10 minutes with 10 ng/mL IL1 $\beta$  or thrombin, or pretreated with IL1 $\beta$  for 10 minutes then treated with thrombin for an additional 10 minutes at room temperature. Samples were then circulated over collagen-coated (100  $\mu\text{g}/\text{mL}$ ) or fibrinogen-coated (100  $\mu\text{g}/\text{mL}$ ) coverslips for 20 minutes in 1X HBSS without  $\text{CaCl}_2$  and  $\text{MgCl}_2$  at room temperature. Photographs were taken with a fluorescent microscope at 20X using Eclipse Ti-E Fluorescent Inverted Microscope (Nikon) and NIS Elements AR Software (Nikon) or an Olympus IX 70 Inverted Microscope with Metamorph Software. Analysis was done using ImageJ (NIH).

**Platelet Samples for Western Blots.** Human platelets were isolated as described above.  $2 \times 10^8$ /mL were either left untreated or treated with 10  $\mu\text{g}/\text{mL}$  Pam3CSK4 or increasing concentrations of IL1 $\beta$  (1-100 ng/mL). Other samples were pretreated with 10 ng/mL IL1 $\beta$  for 10 minutes then treated with either 0.5U/mL thrombin or 10  $\mu\text{g}/\text{mL}$  collagen for an additional 10 minutes. P-p38 and total p38 levels were determined by western blot.

***P. gingivalis* Infection.** Culturing and inoculation of *P. gingivalis* was done as previously described<sup>4-6</sup>. Briefly, *P. gingivalis* strain 381 was grown anaerobically on blood agar plates with hemin and menadione. Bacteria was collected and resuspended in sterile 1X PBS (pH 7.2). Mice were given 4% sulfamethoxazole in their drinking water for 2 weeks to clear oral micro flora. Mice were then challenged orally on the buccal surface of the maxilla 3 times for 1 week with  $1 \times 10^9$  CFU in 2% carboxymethyl cellulose. Mock-infected mice were treated with PBS and 2% carboxymethyl cellulose. Mice were sacrificed 24 h after the last oral challenge (Acute Infection) or 6 weeks (Chronic Infection). Blood cell counts were determined using a Coulter® A<sup>c</sup>-T Series Analyzer (Beckman Coulter). Heterotypic aggregates were measured from whole blood samples, stained with anti-mouse CD41 FITC conjugated and anti-mouse Ly6G PE-Cy7 conjugated antibodies, or corresponding isotype controls. Samples were analyzed on a flow cytometer gating for neutrophils and measuring the percent positive for platelets. Citrated plasma samples were pooled for each condition and then concentrated using centrifugal filters with a molecular weight cut off of 10kDa. Proform of IL1 $\beta$  were determined by western blot.

**Statistics.** Graphs consist of the average  $\pm$  the standard deviation (SD). Some data are reported as the percent of No Treatment (NT), set to 100%, and analyzed using a one-sample t-test with a normal distribution, a theoretical mean of 100, and significance set at  $p < 0.05$ . Other data are analyzed either by a Student's t-test or ANOVA, followed by a Tukey's Multiple Comparison Test. All statistics were done using GraphPad Prism 5.

Descriptive statistics for the FHS are displayed as mean  $\pm$  SD for continuous variables and count (percentage) for categorical variables. The qRT-PCR results cycle threshold (Ct) values were corrected ( $\Delta$ Ct) by the geometric mean of three reference genes ( $\beta$  actin (ACTB),  $\beta$ 2-microglobulin (B2M), glyceraldehyde-3-phosphate dehydrogenase (GAPDH)), previously found to be highly correlated<sup>1</sup>. Genes not expressed, *i.e.*, failing to surpass the Ct within a set period, were assigned the maximum Ct value allowed according to our qRT-PCR procedures (30 cycles). Multivariable linear regression models for gene expression as  $\Delta$ Ct values were fitted adjusting the following potential confounding variables (all assessed at the same examination when RNA was collected): BMI, smoking status, total cholesterol, HDL cholesterol, triglycerides, systolic blood pressure, diastolic blood pressure, glucose level, diabetes, coronary heart disease, lipid-lowering therapy, hormone replacement therapy, antihypertensive therapy, and regular aspirin use (at least 3 $\times$  per week). In addition, we estimated multivariable corrected models with BMI stratified by obesity status (BMI <25,  $\geq$ 25 and <30, and  $\geq$ 30 kg/m<sup>2</sup>) to aid in the presentation of BMI associated expression values. To correct for the number of statistical comparisons conducted for each gene, that is, 6 regression models with 16 covariates, we employed false discovery rate (FDR) correction set at 5%. All gene expression analyses were done using Stata 10.1 statistical software.

## References

1. Freedman JE, Larson MG, Tanriverdi K, O'Donnell CJ, Morin K, Hakanson AS, Vasan RS, Johnson AD, Iafrafi MD, Benjamin EJ. Relation of platelet and leukocyte inflammatory transcripts to body mass index in the Framingham heart study. *Circulation*. 2010; 122:119-129.
2. Beaulieu LM, Lin E, Morin KM, Tanriverdi K, Freedman JE. Regulatory effects of TLR2 on megakaryocytic cell function. *Blood*. 2011; 117:5963-5974.
3. Blair P, Rex S, Vitseva O, Beaulieu L, Tanriverdi K, Chakrabarti S, Hayashi C, Genco CA, Iafrafi M, Freedman JE. Stimulation of Toll-like receptor 2 in human platelets induces a thromboinflammatory response through activation of phosphoinositide 3-kinase. *Circ Res*. 2009; 104:346-354.
4. Hayashi C, Madrigal AG, Liu X, Ukai T, Goswami S, Gudino CV, Gibson FC, 3rd, Genco CA. Pathogen-mediated inflammatory atherosclerosis is mediated in part via Toll-like receptor 2-induced inflammatory responses. *J Innate Immun*. 2010; 2:334-343.
5. Hayashi C, Viereck J, Hua N, Phinikaridou A, Madrigal AG, Gibson FC, 3rd, Hamilton JA, Genco CA. Porphyromonas gingivalis accelerates inflammatory atherosclerosis in the innominate artery of ApoE deficient mice. *Atherosclerosis*. 2011; 215:52-59.
6. Gibson FC, 3rd, Genco CA. Prevention of Porphyromonas gingivalis-induced oral bone loss following immunization with gingipain R1. *Infect Immun*. 2001; 69:7959-7963.

Supplemental Figure I

A.

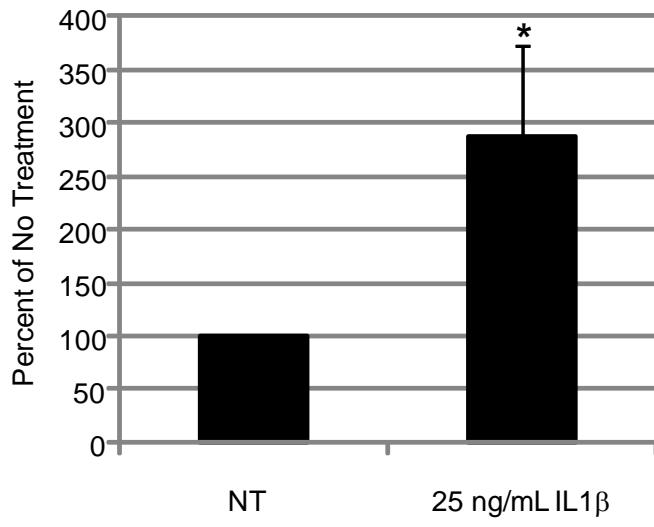

B.

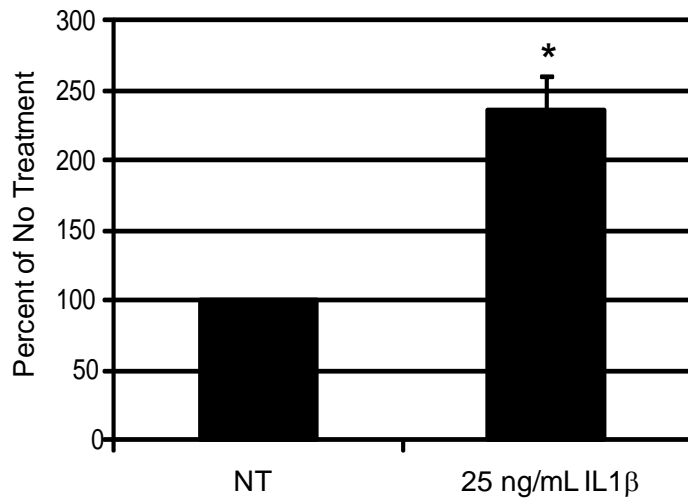

C.

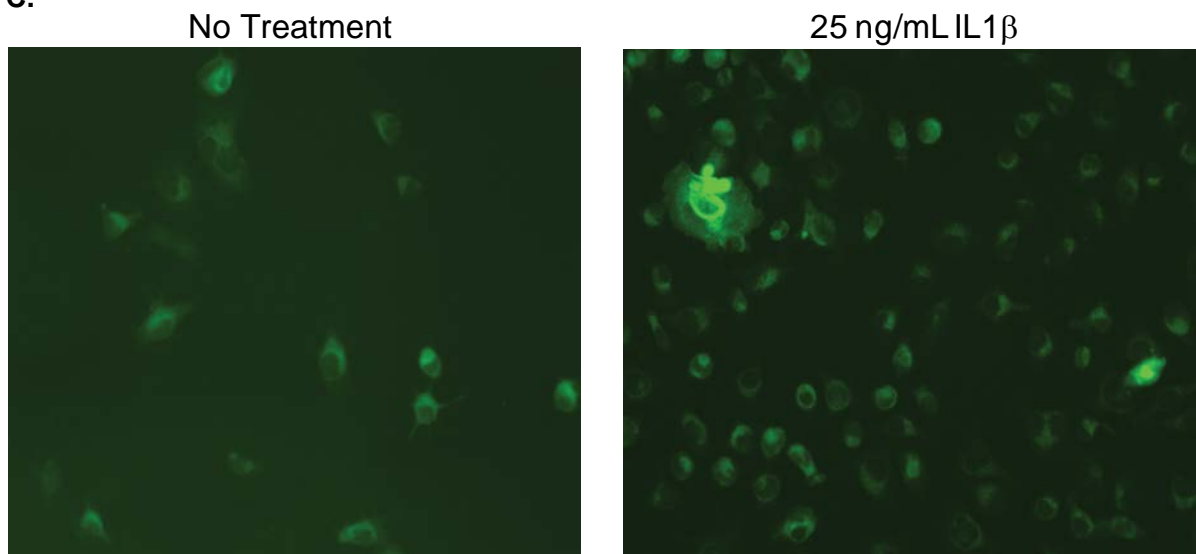

**Supplemental Figure I: IL1R1 regulates megakaryocyte adhesion.** Meg-01 cells were treated with 25 ng/mL IL1 $\beta$  for 3 hours then allowed to adhere onto fibrinogen (A) or fibronectin (B). n=4; \* $p$ <0.05. (C) Representative photographs of Meg-01 cells adherent to fibronectin and stained with anti-CD41 FITC conjugated antibodies.

**Supplemental Figure II**

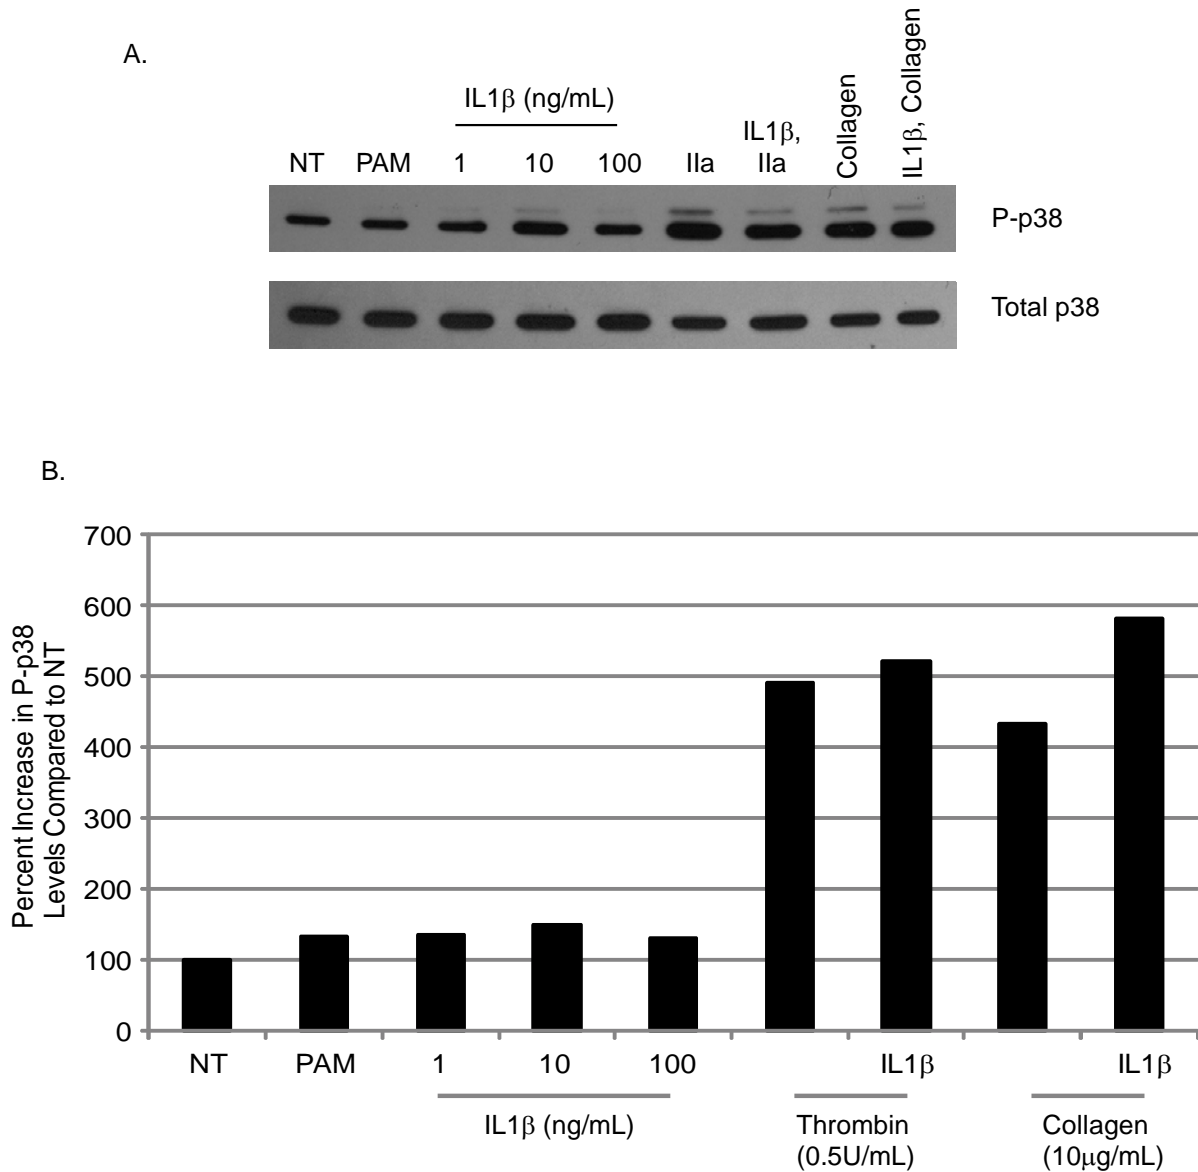

**Supplemental Figure II: IL1 $\beta$  signals through p38 and enhances its phosphorylation in the presence of thrombin and collagen.** Human platelets were left untreated (No Treatment – NT) or treated with 10  $\mu$ g/mL Pam3CSK4 (PAM) or 1-100 ng/mL IL1 $\beta$  for 10 minutes. Other samples were pretreated with 10 ng/mL IL1 $\beta$ , then treated for an additional 10 minutes with either 0.5 U/mL thrombin or 10  $\mu$ g/mL collagen. (A) Representative western blot of platelet samples probed for phospho- and total p38. (B) Graph of the densitometry of the above western blot.

Supplemental Figure III

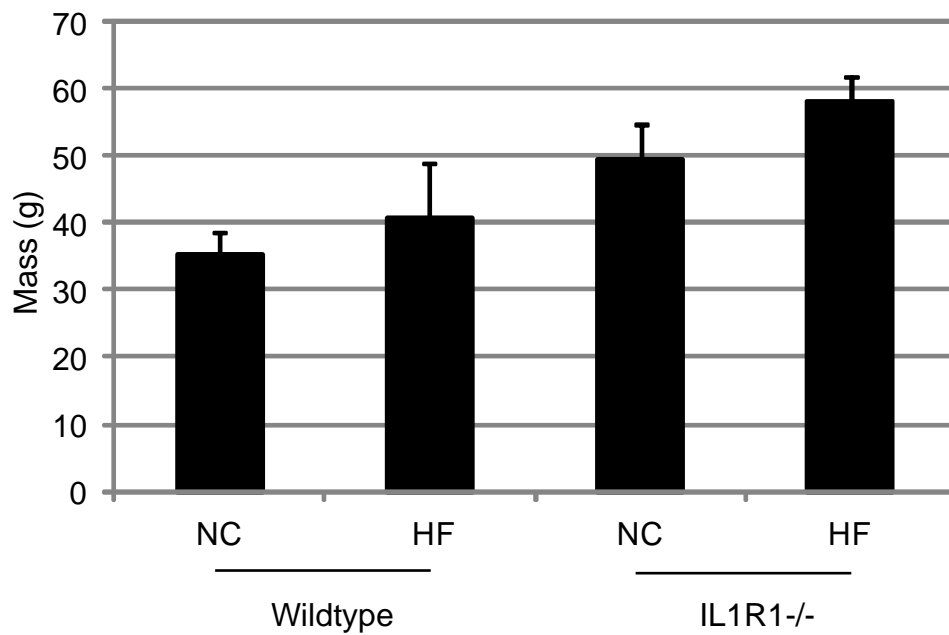

**Supplemental Figure III: Mass of WT and IL1R1<sup>-/-</sup> mice on a normal chow or high fat diet.** Wildtype and IL1R1<sup>-/-</sup> mice were placed on a normal chow (NC) or high fat diet (HF) diet for 10 weeks. Mass was measured at time of experiment; n=8-10 mice in each group.

## Supplemental Figure IV

A.

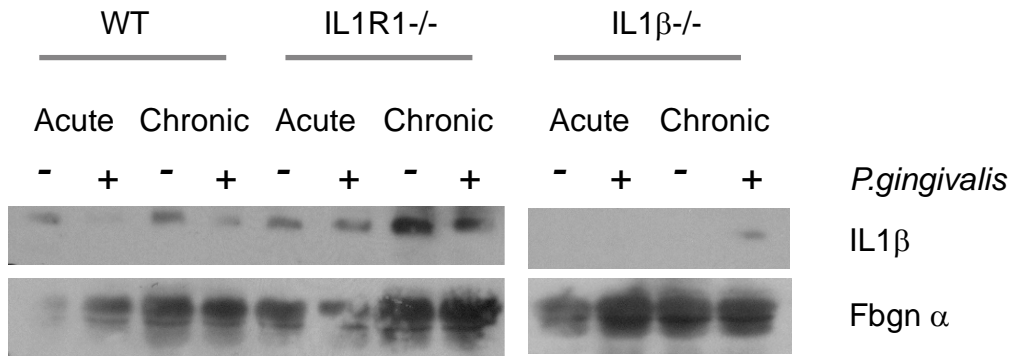

B.

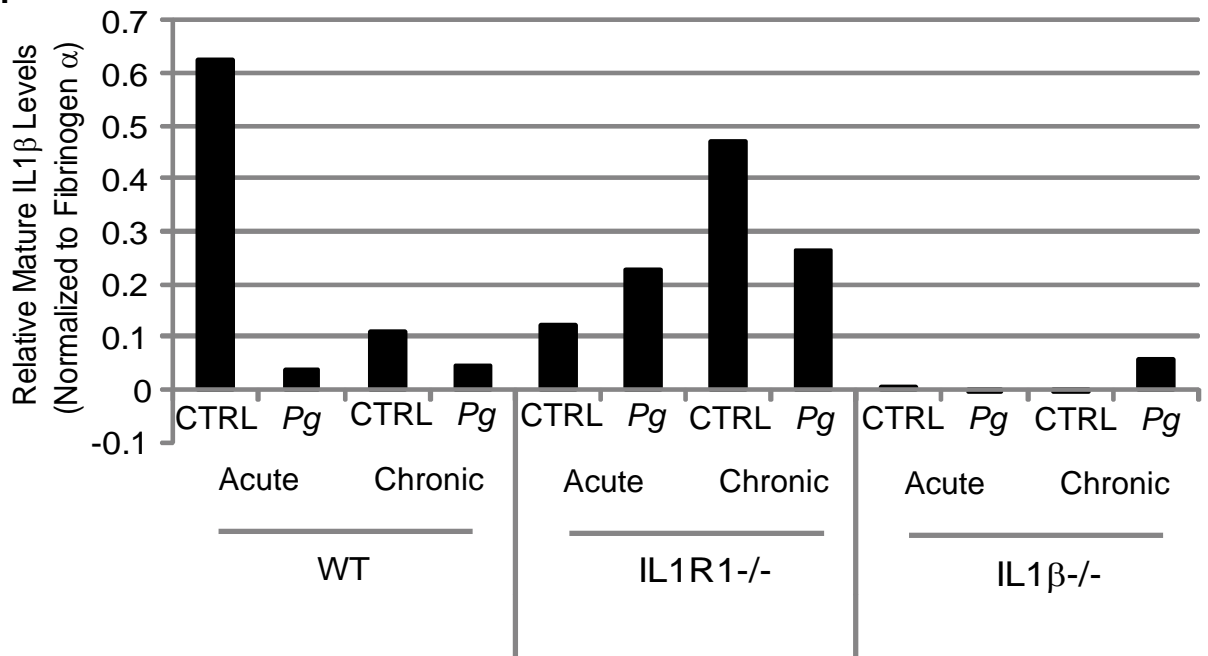



### Supplemental Figure IV

C.

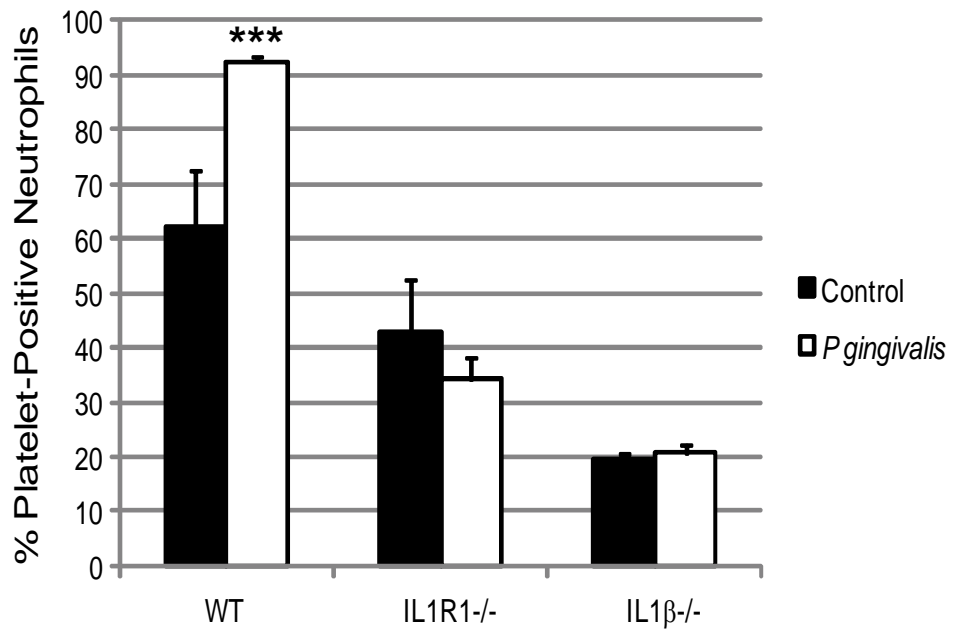

D.

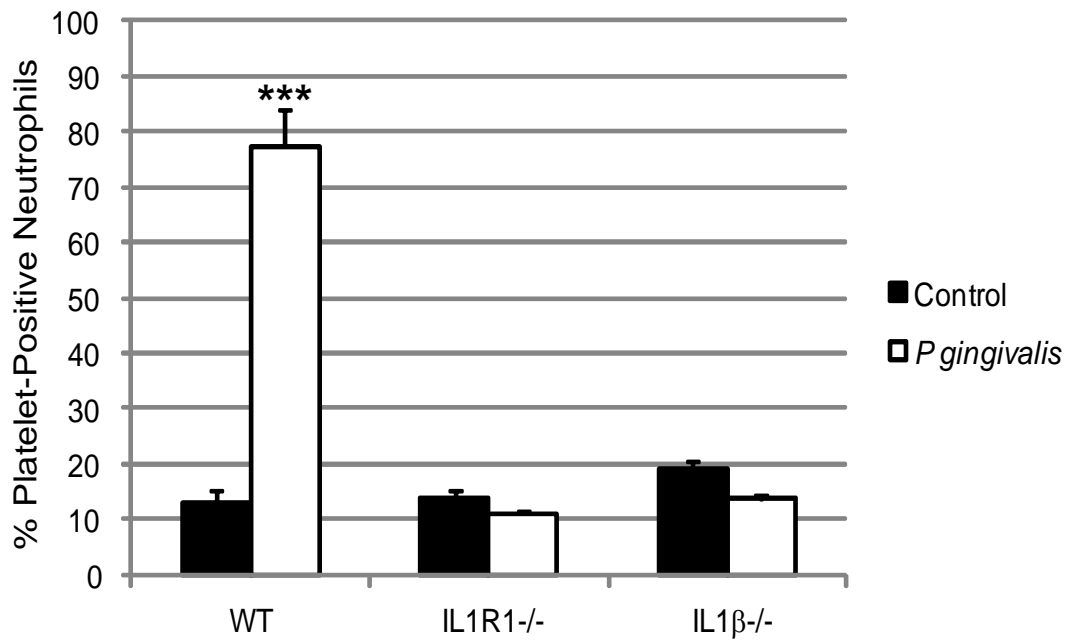

Supplemental Figure IV

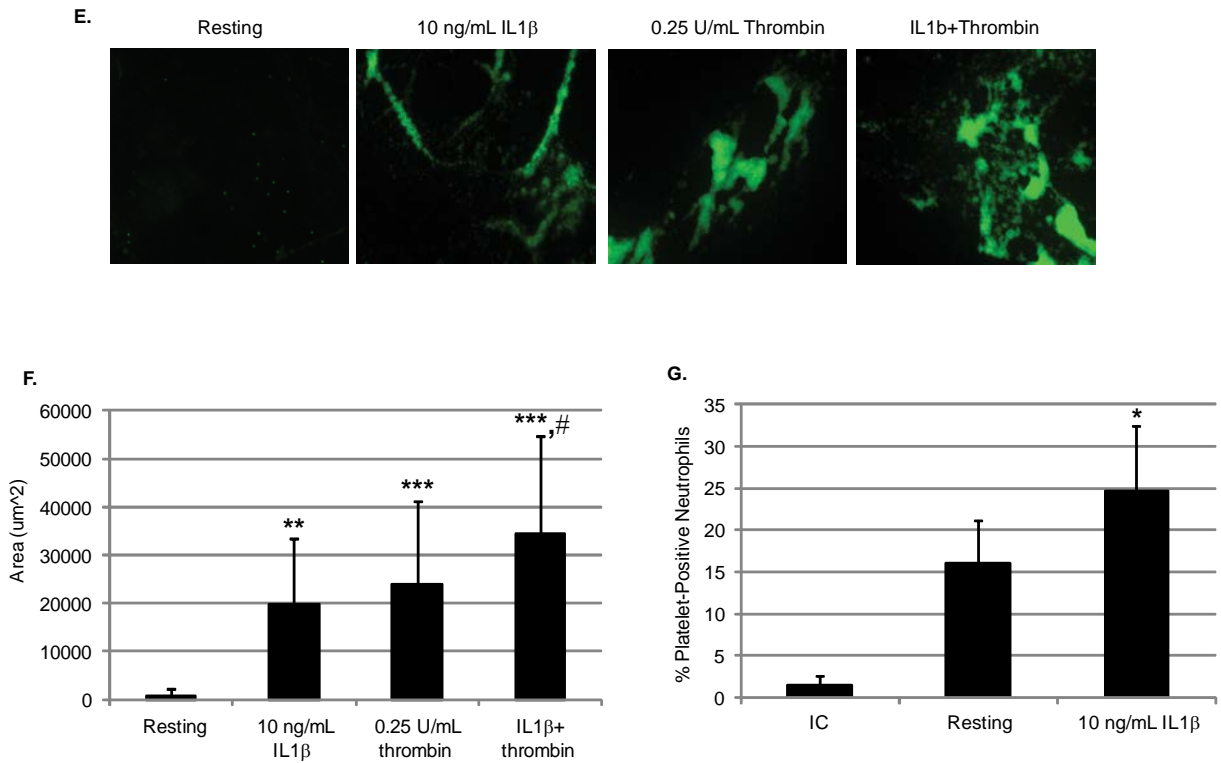

**Supplemental Figure IV: IL1 $\beta$  affects heterotypic aggregate formation in the setting of infection.** Whole blood from wildtype, IL1R1<sup>-/-</sup>, IL1 $\beta$ <sup>-/-</sup> mice either infected with vehicle (control) or *P. gingivalis* for 24 h (Acute) or 6 weeks (Chronic). (A) Western blot on concentrated plasma samples collected from mice were analyzed for the proform of IL1 $\beta$  and the loading control, fibrinogen  $\alpha$ . (B) Graph of the densitometry of the above western blot. Whole blood was analyzed for platelet-positive neutrophils at the Acute (C) and Chronic (D) timepoints. n=3 mice in each group. (E) Representative photographs of isolated IL1 $\beta$ <sup>-/-</sup> mouse platelets treated with IL1 $\beta$ , thrombin, or IL1 $\beta$  then thrombin adherent to collagen. (F) Quantification of the area covered by platelets in each photograph. n=10 mice; \*\* $p$ <0.01, \*\*\* $p$ <0.001 compared to Resting; # $p$ <0.05 compared to IL1 $\beta$  alone. (G) The percent of platelet-positive neutrophils in whole blood from IL1 $\beta$ <sup>-/-</sup> mice were treated with IL1 $\beta$ . n=6; \* $p$ <0.05 compared to Resting.

## Supplemental Tables

**Supplemental Table I: Mass and Blood Cell Counts from Mice in Acute and Chronic Infection Experiments.**

| Infection           | Acute                                         |                                               |                                               |                                              |                                              |                                               | Chronic                                       |                                              |                                              |                                              |                                              |                                              |
|---------------------|-----------------------------------------------|-----------------------------------------------|-----------------------------------------------|----------------------------------------------|----------------------------------------------|-----------------------------------------------|-----------------------------------------------|----------------------------------------------|----------------------------------------------|----------------------------------------------|----------------------------------------------|----------------------------------------------|
|                     | WT                                            |                                               | IL1R1 <sup>-/-</sup>                          |                                              | IL1β <sup>-/-</sup>                          |                                               | WT                                            |                                              | IL1R1 <sup>-/-</sup>                         |                                              | IL1β <sup>-/-</sup>                          |                                              |
| Mouse Model         | -                                             | +                                             | -                                             | +                                            | -                                            | +                                             | -                                             | +                                            | -                                            | +                                            | -                                            | +                                            |
| <i>P.gingivalis</i> | -                                             | +                                             | -                                             | +                                            | -                                            | +                                             | -                                             | +                                            | -                                            | +                                            | -                                            | +                                            |
| Mass (g)            | 28.3±0.6                                      | 25.7±1.5                                      | 25.0±0.0                                      | 27.3±0.6                                     | 35.0±1.7                                     | 24.0±0.0                                      | 34.4±2.0                                      | 32.4±3.0                                     | 32.6±2.0                                     | 31.8±1.5                                     | 32.2±1.0                                     | 33.1±4.2                                     |
| WBC (per L*g)       | 20.29x10 <sup>8</sup><br>±5.9x10 <sup>7</sup> | 26.63x10 <sup>8</sup><br>±3.6x10 <sup>7</sup> | 2.89x10 <sup>8</sup><br>±10.2x10 <sup>7</sup> | 3.76x10 <sup>8</sup><br>±5.4x10 <sup>7</sup> | 2.88x10 <sup>8</sup><br>±7.2x10 <sup>7</sup> | 2.42x10 <sup>8</sup><br>±11.2x10 <sup>7</sup> | 2.13x10 <sup>8</sup><br>±12.0x10 <sup>7</sup> | 2.22x10 <sup>8</sup><br>±8.5x10 <sup>7</sup> | 1.34x10 <sup>8</sup><br>±5.4x10 <sup>7</sup> | 1.43x10 <sup>8</sup><br>±7.7x10 <sup>7</sup> | 2.55x10 <sup>8</sup><br>±8.8x10 <sup>7</sup> | 0.84x10 <sup>8</sup><br>±6.7x10 <sup>7</sup> |
| Platelet (per μL*g) | 26477<br>±11384                               | 29832<br>±3145                                | 28493<br>±6499                                | 26170<br>±1880                               | 19739<br>±12493                              | 11250<br>±6737                                | 19838<br>±8616                                | 24376<br>±9539                               | 27765<br>±8165                               | 20954<br>±8438                               | 16879<br>±11168                              | 19943<br>±3152                               |

White blood cells (WBC) and platelet concentrations were determined from whole blood samples and normalized for mass.

**Supplemental Table II: Average Gene Expression Ct and ΔCt for WT and IL1R1<sup>-/-</sup> Mouse Megakaryocytes.**

|       | Ct           |                      | ΔCt          |                      |
|-------|--------------|----------------------|--------------|----------------------|
|       | WT           | IL1R1 <sup>-/-</sup> | WT           | IL1R1 <sup>-/-</sup> |
| COX2  | 22.83 ± 5.50 | 25.64 ± 4.09         | 7.95 ± 4.13  | 9.57 ± 2.16          |
| MCP-1 | 27.96 ± 2.04 | 25.13 ± 4.37         | 13.08 ± 3.41 | 9.22 ± 1.83          |
| NFκB1 | 18.89 ± 3.68 | 19.96 ± 1.89         | 4.01 ± 2.31  | 5.50 ± 0.85          |
| TLR2  | 21.44 ± 4.32 | 24.48 ± 4.11         | 7.56 ± 4.36  | 8.52 ± 1.76          |
| IL1b  | 19.48 ± 4.33 | 21.53 ± 3.83         | 4.60 ± 2.95  | 5.62 ± 1.37          |
| IL1R1 | 23.41 ± 4.93 | 23.80 ± 4.24         | 8.53 ± 3.56  | 7.90 ± 1.76          |
| CD41  | 14.34 ± 1.34 | 15.69 ± 2.05         | -0.55 ± 0.03 | -0.22 ± 0.65         |
| GP1b  | 21.24 ± 4.30 | 22.16 ± 4.08         | 6.36 ± 2.93  | 6.24 ± 1.90          |
| GAPDH | 14.88 ± 1.37 | 15.92 ± 2.63         |              |                      |

Ct and ΔCt ± Standard Deviation.

**Supplemental Table III. Clinical correlates of gene expression in platelets. Results from adjusted multi-variable adjustment of BMI-Score**

|                                   | IL18                              | IL1 $\beta$                        | IRAK1                             | MMP9                                  | MYD88                              | NLRP2                             |
|-----------------------------------|-----------------------------------|------------------------------------|-----------------------------------|---------------------------------------|------------------------------------|-----------------------------------|
|                                   | $\beta \pm se, p\text{-value}$    | $\beta \pm se, p\text{-value}$     | $\beta \pm se, p\text{-value}$    | $\beta \pm se, p\text{-value}$        | $\beta \pm se, p\text{-value}$     | $\beta \pm se, p\text{-value}$    |
| Age, y                            | 0.003 $\pm$ 0.010,<br>$p=0.8032$  | 0.004 $\pm$ 0.010,<br>$p=0.7265$   | -0.001 $\pm$ 0.010,<br>$p=0.9087$ | 0.055 $\pm$ 0.010,<br>$p<0.0001^{**}$ | 0.011 $\pm$ 0.009,<br>$p=0.2464$   | 0.005 $\pm$ 0.011,<br>$p=0.6602$  |
| Female Sex                        | -0.008 $\pm$ 0.162,<br>$p=0.9589$ | -0.053 $\pm$ 0.163,<br>$p=0.7472$  | 0.247 $\pm$ 0.156,<br>$p=0.1151$  | 0.281 $\pm$ 0.157, $p=0.0739$         | 0.356 $\pm$ 0.147,<br>$p=0.0157$   | 0.092 $\pm$ 0.169,<br>$p=0.5866$  |
| BMI, kg/m <sup>2</sup>            | 0.025 $\pm$ 0.015,<br>$p=0.0917$  | 0.029 $\pm$ 0.015,<br>$p=0.0490^*$ | 0.002 $\pm$ 0.014,<br>$p=0.9111$  | 0.051 $\pm$ 0.014,<br>$p=0.0003^{**}$ | 0.030 $\pm$ 0.013,<br>$p=0.0253^*$ | 0.022 $\pm$ 0.015,<br>$p=0.1539$  |
| Diabetes                          | 0.295 $\pm$ 0.269,<br>$p=0.2723$  | 0.301 $\pm$ 0.272,<br>$p=0.2684$   | -0.003 $\pm$ 0.260,<br>$p=0.9900$ | 0.400 $\pm$ 0.261, $p=0.1258$         | 0.457 $\pm$ 0.245,<br>$p=0.0625$   | 0.348 $\pm$ 0.281,<br>$p=0.2165$  |
| Total Cholesterol,<br>mg/100mL    | 0.001 $\pm$ 0.003,<br>$p=0.7778$  | 0.000 $\pm$ 0.003,<br>$p=0.8847$   | 0.000 $\pm$ 0.002,<br>$p=0.8929$  | 0.002 $\pm$ 0.002, $p=0.3322$         | 0.003 $\pm$ 0.002,<br>$p=0.1602$   | 0.002 $\pm$ 0.003,<br>$p=0.4219$  |
| HDL Cholesterol<br>mg/100mL       | 0.006 $\pm$ 0.005,<br>$p=0.2932$  | 0.006 $\pm$ 0.005,<br>$p=0.2318$   | 0.002 $\pm$ 0.005,<br>$p=0.7274$  | -0.013 $\pm$ 0.005, $p=0.0101$        | -0.002 $\pm$ 0.005,<br>$p=0.7325$  | 0.005 $\pm$ 0.006,<br>$p=0.3435$  |
| Triglyceride,<br>mg/100mL         | -0.002 $\pm$ 0.001,<br>$p=0.1961$ | -0.002 $\pm$ 0.001,<br>$p=0.2138$  | -0.001 $\pm$ 0.001,<br>$p=0.3240$ | -0.001 $\pm$ 0.001, $p=0.6334$        | -0.001 $\pm$ 0.001,<br>$p=0.3545$  | -0.002 $\pm$ 0.001,<br>$p=0.1031$ |
| Antihypertensive<br>Treatment     | 0.302 $\pm$ 0.161,<br>$p=0.0618$  | 0.359 $\pm$ 0.163,<br>$p=0.0278$   | 0.148 $\pm$ 0.156,<br>$p=0.3431$  | 0.187 $\pm$ 0.157, $p=0.2322$         | 0.291 $\pm$ 0.147,<br>$p=0.0482$   | 0.441 $\pm$ 0.169,<br>$p=0.0091$  |
| Systolic Blood<br>Pressure, mmHg  | 0.004 $\pm$ 0.005,<br>$p=0.4719$  | 0.004 $\pm$ 0.005,<br>$p=0.4062$   | 0.007 $\pm$ 0.005,<br>$p=0.1594$  | -0.004 $\pm$ 0.005, $p=0.4804$        | 0.002 $\pm$ 0.005,<br>$p=0.6521$   | 0.002 $\pm$ 0.006,<br>$p=0.6542$  |
| Diastolic Blood<br>Pressure, mmHg | 0.001 $\pm$ 0.009,<br>$p=0.8953$  | -0.004 $\pm$ 0.009,<br>$p=0.6752$  | -0.012 $\pm$ 0.009,<br>$p=0.1639$ | -0.010 $\pm$ 0.009, $p=0.2549$        | -0.005 $\pm$ 0.008,<br>$p=0.5099$  | -0.002 $\pm$ 0.009,<br>$p=0.8640$ |
| Glucose, mg/dL                    | -0.000 $\pm$ 0.004,<br>$p=0.9335$ | -0.002 $\pm$ 0.004,<br>$p=0.5208$  | 0.002 $\pm$ 0.004,<br>$p=0.6366$  | -0.003 $\pm$ 0.004, $p=0.4457$        | -0.005 $\pm$ 0.003,<br>$p=0.1155$  | -0.002 $\pm$ 0.004,<br>$p=0.5708$ |
| Lipid Treatment                   | -0.488 $\pm$ 0.171,<br>$p=0.0043$ | -0.342 $\pm$ 0.172,<br>$p=0.0476$  | -0.480 $\pm$ 0.165,<br>$p=0.0037$ | -0.210 $\pm$ 0.166, $p=0.2044$        | -0.158 $\pm$ 0.156,<br>$p=0.3110$  | -0.307 $\pm$ 0.179,<br>$p=0.0855$ |
| Prevalent CHD                     | -0.011 $\pm$ 0.244,<br>$p=0.9641$ | 0.171 $\pm$ 0.247,<br>$p=0.4880$   | 0.220 $\pm$ 0.236,<br>$p=0.3529$  | 0.399 $\pm$ 0.237, $p=0.0923$         | 0.100 $\pm$ 0.223,<br>$p=0.6521$   | -0.018 $\pm$ 0.256,<br>$p=0.9437$ |
| Aspirin (3/week)                  | 0.030 $\pm$ 0.154,<br>$p=0.8455$  | -0.132 $\pm$ 0.155,<br>$p=0.3943$  | 0.152 $\pm$ 0.149,<br>$p=0.3068$  | -0.144 $\pm$ 0.149, $p=0.3343$        | -0.134 $\pm$ 0.140,<br>$p=0.3377$  | -0.000 $\pm$ 0.161,<br>$p=0.9995$ |
| Current HRT                       | 0.285 $\pm$ 0.311,<br>$p=0.3600$  | 0.027 $\pm$ 0.314,<br>$p=0.9304$   | -0.116 $\pm$ 0.301,<br>$p=0.6998$ | 0.187 $\pm$ 0.302, $p=0.5354$         | 0.054 $\pm$ 0.284,<br>$p=0.8491$   | 0.180 $\pm$ 0.326,<br>$p=0.5798$  |
| Smoker                            | -0.090 $\pm$ 0.255,<br>$p=0.7231$ | -0.009 $\pm$ 0.258,<br>$p=0.9730$  | -0.110 $\pm$ 0.247,<br>$p=0.6573$ | 0.107 $\pm$ 0.248, $p=0.6671$         | -0.168 $\pm$ 0.232,<br>$p=0.4699$  | -0.130 $\pm$ 0.267,<br>$p=0.6263$ |

n=1819. Associations significant at  $p<0.05$  are marked with an \* and those significant after correction for multiple comparisons are marked with \*\*.

**Supplemental Table IV. Clinical correlates of gene expression in platelets. Results from adjusted multi-variable adjustment of BMI Stratification.**

|                                   | IL18                                | IL1 $\beta$                         | IRAK1                               | MMP9                                | MYD88                              | NLRP3                              |
|-----------------------------------|-------------------------------------|-------------------------------------|-------------------------------------|-------------------------------------|------------------------------------|------------------------------------|
|                                   | $\beta \pm se, p\text{-value}$      | $\beta \pm se, p\text{-value}$     | $\beta \pm se, p\text{-value}$     |
| Age, y                            | 0.002 $\pm$ 0.010,<br>$p=0.8516$    | 0.003 $\pm$ 0.010,<br>$p=0.7808$    | -0.001 $\pm$ 0.010,<br>$p=0.9169$   | 0.053 $\pm$ 0.010,<br>$p<0.0001$ ** | 0.010 $\pm$ 0.009,<br>$p=0.2699$   | 0.004 $\pm$ 0.011,<br>$p=0.6759$   |
| Female Sex                        | 0.003 $\pm$ 0.163,<br>$p=0.9873$    | -0.043 $\pm$ 0.164,<br>$p=0.7915$   | 0.260 $\pm$ 0.157,<br>$p=0.0988$    | 0.280 $\pm$ 0.158,<br>$p=0.0768$    | 0.358 $\pm$ 0.148,<br>$p=0.0158^*$ | 0.113 $\pm$ 0.170,<br>$p=0.5068$   |
| Overweight<br>(25 $\leq$ BMI<30)  | 0.224 $\pm$ 0.185,<br>$p=0.2243$    | 0.226 $\pm$ 0.186,<br>$p=0.2246$    | 0.164 $\pm$ 0.179,<br>$p=0.3589$    | 0.113 $\pm$ 0.180,<br>$p=0.5295$    | 0.176 $\pm$ 0.168,<br>$p=0.2950$   | 0.354 $\pm$ 0.193,<br>$p=0.0666$   |
| Obese (BMI $\geq$ 30)             | 0.355 $\pm$ 0.204,<br>$p=0.0826$    | 0.404 $\pm$ 0.206,<br>$p=0.0504$    | 0.108 $\pm$ 0.198,<br>$p=0.5836$    | 0.439 $\pm$ 0.199,<br>$p=0.0273$ *  | 0.425 $\pm$ 0.186,<br>$p=0.0224^*$ | 0.430 $\pm$ 0.214,<br>$p=0.0441^*$ |
| Lipid Treatment                   | -0.499 $\pm$ 0.171,<br>$p=0.0035^*$ | -0.353 $\pm$ 0.173,<br>$p=0.0410^*$ | -0.489 $\pm$ 0.165,<br>$p=0.0032^*$ | -0.214 $\pm$ 0.166,<br>$p=0.1985$   | -0.167 $\pm$ 0.156,<br>$p=0.2828$  | -0.326 $\pm$ 0.179,<br>$p=0.0686$  |
| Total Cholesterol,<br>mg/100mL    | 0.001 $\pm$ 0.003,<br>$p=0.7870$    | 0.000 $\pm$ 0.003,<br>$p=0.8846$    | 0.000 $\pm$ 0.002,<br>$p=0.9356$    | 0.003 $\pm$ 0.003,<br>$p=0.2913$    | 0.003 $\pm$ 0.002,<br>$p=0.1533$   | 0.002 $\pm$ 0.003,<br>$p=0.4568$   |
| HDL Cholesterol<br>mg/100mL       | 0.006 $\pm$ 0.005,<br>$p=0.2772$    | 0.006 $\pm$ 0.005,<br>$p=0.2276$    | 0.003 $\pm$ 0.005,<br>$p=0.6152$    | -0.015 $\pm$ 0.005,<br>$p=0.0037^*$ | -0.002 $\pm$ 0.005,<br>$p=0.7336$  | 0.006 $\pm$ 0.006,<br>$p=0.2511$   |
| Triglyceride, mg/100mL            | -0.002 $\pm$ 0.001,<br>$p=0.1948$   | -0.002 $\pm$ 0.001,<br>$p=0.2113$   | -0.001 $\pm$ 0.001,<br>$p=0.3243$   | -0.001 $\pm$ 0.001,<br>$p=0.6488$   | -0.001 $\pm$ 0.001,<br>$p=0.3421$  | -0.002 $\pm$ 0.001,<br>$p=0.1006$  |
| Antihypertensive<br>Treatment     | 0.302 $\pm$ 0.161,<br>$p=0.0609$    | 0.362 $\pm$ 0.163,<br>$p=0.0261^*$  | 0.134 $\pm$ 0.156,<br>$p=0.3909$    | 0.232 $\pm$ 0.157,<br>$p=0.1393$    | 0.295 $\pm$ 0.147,<br>$p=0.0446^*$ | 0.424 $\pm$ 0.169,<br>$p=0.0120^*$ |
| Systolic Blood Pressure,<br>mmHg  | 0.004 $\pm$ 0.005,<br>$p=0.4950$    | 0.004 $\pm$ 0.005,<br>$p=0.4218$    | 0.007 $\pm$ 0.005,<br>$p=0.1797$    | -0.003 $\pm$ 0.005,<br>$p=0.5122$   | 0.002 $\pm$ 0.005,<br>$p=0.6499$   | 0.002 $\pm$ 0.006,<br>$p=0.7152$   |
| Diastolic Blood<br>Pressure, mmHg | 0.001 $\pm$ 0.009,<br>$p=0.9251$    | -0.004 $\pm$ 0.009,<br>$p=0.6476$   | -0.013 $\pm$ 0.009,<br>$p=0.1545$   | -0.010 $\pm$ 0.009,<br>$p=0.2679$   | -0.006 $\pm$ 0.008,<br>$p=0.4798$  | -0.002 $\pm$ 0.009,<br>$p=0.8088$  |
| Glucose, mg/dL                    | -0.000 $\pm$ 0.004,<br>$p=0.9503$   | -0.002 $\pm$ 0.004,<br>$p=0.5408$   | 0.002 $\pm$ 0.004,<br>$p=0.6603$    | -0.002 $\pm$ 0.004,<br>$p=0.5452$   | -0.005 $\pm$ 0.003,<br>$p=0.1231$  | -0.002 $\pm$ 0.004,<br>$p=0.5540$  |
| Diabetes                          | 0.322 $\pm$ 0.269,<br>$p=0.2322$    | 0.327 $\pm$ 0.272,<br>$p=0.2287$    | 0.011 $\pm$ 0.260,<br>$p=0.9659$    | 0.440 $\pm$ 0.262,<br>$p=0.0932$    | 0.472 $\pm$ 0.245,<br>$p=0.0544$   | 0.380 $\pm$ 0.282,<br>$p=0.1772$   |
| Prevalent CHD                     | -0.013 $\pm$ 0.244,<br>$p=0.9565$   | 0.169 $\pm$ 0.247,<br>$p=0.4928$    | 0.217 $\pm$ 0.236,<br>$p=0.3585$    | 0.395 $\pm$ 0.238,<br>$p=0.0966$    | 0.102 $\pm$ 0.223,<br>$p=0.6482$   | -0.021 $\pm$ 0.256,<br>$p=0.9341$  |
| Aspirin (3/week)                  | 0.036 $\pm$ 0.154,<br>$p=0.8137$    | -0.126 $\pm$ 0.155,<br>$p=0.4179$   | 0.157 $\pm$ 0.149,<br>$p=0.2913$    | -0.143 $\pm$ 0.149,<br>$p=0.3383$   | -0.129 $\pm$ 0.140,<br>$p=0.3579$  | 0.011 $\pm$ 0.161,<br>$p=0.9467$   |
| Current HRT                       | 0.300 $\pm$ 0.312,<br>$p=0.3358$    | 0.043 $\pm$ 0.315,<br>$p=0.8910$    | -0.106 $\pm$ 0.301,<br>$p=0.7248$   | 0.193 $\pm$ 0.303,<br>$p=0.5237$    | 0.068 $\pm$ 0.284,<br>$p=0.8097$   | 0.204 $\pm$ 0.326,<br>$p=0.5310$   |
| Smoker                            | -0.091 $\pm$ 0.255,<br>$p=0.7212$   | -0.011 $\pm$ 0.258,<br>$p=0.9654$   | -0.101 $\pm$ 0.247,<br>$p=0.6814$   | 0.080 $\pm$ 0.248,<br>$p=0.7461$    | -0.171 $\pm$ 0.232,<br>$p=0.4620$  | -0.120 $\pm$ 0.267,<br>$p=0.6518$  |

n=1819. Associations significant at  $p<0.05$  are marked with an \* and those significant after correction for multiple comparisons are marked with \*\*.

**Supplemental Table V. Association of Serum Biomarker levels and Platelet Gene Expression. Results from adjusted multi-variable adjustment of BMI-Scores.**

|           | IL18                                  | IL1 $\beta$                         | IRAK1                               | MMP9                                  | MYD88                              | NLRP3                               |
|-----------|---------------------------------------|-------------------------------------|-------------------------------------|---------------------------------------|------------------------------------|-------------------------------------|
|           | $\beta \pm se, p\text{-value}$        | $\beta \pm se, p\text{-value}$      | $\beta \pm se, p\text{-value}$      | $\beta \pm se, p\text{-value}$        | $\beta \pm se, p\text{-value}$     | $\beta \pm se, p\text{-value}$      |
| CRP       | 0.017 $\pm$ 0.070,<br>$p=0.8132$      | 0.087 $\pm$ 0.071,<br>$p=0.2217$    | 0.062 $\pm$ 0.068,<br>$p=0.3622$    | 0.492 $\pm$ 0.067,<br>$p<0.0001^{**}$ | 0.207 $\pm$ 0.064,<br>$p=0.0012^*$ | 0.066 $\pm$ 0.073,<br>$p=0.3703$    |
| ICAM1     | -0.530 $\pm$ 0.263,<br>$p=0.0440^*$   | -0.275 $\pm$ 0.266,<br>$p=0.3005$   | -0.081 $\pm$ 0.255,<br>$p=0.7507$   | 0.685 $\pm$ 0.253,<br>$p=0.0070^*$    | -0.218 $\pm$ 0.240,<br>$p=0.3627$  | -0.672 $\pm$ 0.275,<br>$p=0.0146^*$ |
| IL6       | -0.061 $\pm$ 0.112,<br>$p=0.5830$     | 0.168 $\pm$ 0.113,<br>$p=0.1382$    | 0.090 $\pm$ 0.108,<br>$p=0.4057$    | 0.737 $\pm$ 0.107,<br>$p<0.0001^{**}$ | 0.174 $\pm$ 0.102,<br>$p=0.0877$   | 0.079 $\pm$ 0.117,<br>$p=0.5019$    |
| MCP1      | -0.380 $\pm$ 0.232,<br>$p=0.1015$     | -0.089 $\pm$ 0.234,<br>$p=0.7051$   | 0.070 $\pm$ 0.225,<br>$p=0.7574$    | 0.302 $\pm$ 0.224,<br>$p=0.1779$      | 0.178 $\pm$ 0.211,<br>$p=0.3991$   | -0.416 $\pm$ 0.242,<br>$p=0.0865$   |
| OPG       | 0.771 $\pm$ 0.255,<br>$p=0.0026^{**}$ | 0.667 $\pm$ 0.258,<br>$p=0.0097^*$  | 0.511 $\pm$ 0.247,<br>$p=0.0390^*$  | -0.062 $\pm$ 0.248,<br>$p=0.8042$     | 0.514 $\pm$ 0.233,<br>$p=0.0275^*$ | 0.837 $\pm$ 0.267,<br>$p=0.0017^*$  |
| PSELECTIN | -0.604 $\pm$ 0.224,<br>$p=0.0072^*$   | -0.494 $\pm$ 0.227,<br>$p=0.0294^*$ | -0.467 $\pm$ 0.217,<br>$p=0.0318^*$ | 0.688 $\pm$ 0.218,<br>$p=0.0016^*$    | -0.176 $\pm$ 0.205,<br>$p=0.3910$  | -0.476 $\pm$ 0.235,<br>$p=0.0431^*$ |
| TNFR      | -0.130 $\pm$ 0.154,<br>$p=0.3998$     | 0.014 $\pm$ 0.155,<br>$p=0.9262$    | 0.098 $\pm$ 0.149,<br>$p=0.5112$    | 0.514 $\pm$ 0.149,<br>$p=0.0006^{**}$ | 0.042 $\pm$ 0.140,<br>$p=0.7651$   | -0.166 $\pm$ 0.161,<br>$p=0.3034$   |

Associations significant at  $p<0.05$  are marked with an \* and those significant after correction for multiple comparisons are marked with \*\*.

**Supplemental Table VI. Full Model Results for BMI-Score and Serum Biomarkers Predicting MMP9 Platelet Gene Expression**

|                                | CRP                                | ICAM1                              | IL6                                | MCP1                               | OPG                                | PSELECTIN                          | TNFR                               |
|--------------------------------|------------------------------------|------------------------------------|------------------------------------|------------------------------------|------------------------------------|------------------------------------|------------------------------------|
|                                | $\beta \pm se, p\text{-value}$     |
| Serum Biomarker                | 0.492±0.067,<br><i>p</i> <0.0001** | 0.685±0.253,<br><i>p</i> =0.0070*  | 0.737±0.107,<br><i>p</i> <0.0001** | 0.302±0.224,<br><i>p</i> =0.1779   | -0.062±0.248,<br><i>p</i> =0.8042  | 0.688±0.218,<br><i>p</i> =0.0016*  | 0.514±0.149,<br><i>p</i> =0.0006** |
| Age, y                         | 0.045±0.010,<br><i>p</i> <0.0001** | 0.056±0.010,<br><i>p</i> =0.0000** | 0.043±0.010,<br><i>p</i> <0.0001** | 0.056±0.010,<br><i>p</i> <0.0001** | 0.056±0.010,<br><i>p</i> <0.0001** | 0.053±0.010,<br><i>p</i> =0.0001** | 0.050±0.010,<br><i>p</i> <0.0001** |
| Female Sex                     | 0.176±0.155,<br><i>p</i> =0.2582   | 0.234±0.160,<br><i>p</i> =0.1434   | 0.282±0.157,<br><i>p</i> =0.0725   | 0.289±0.159,<br><i>p</i> =0.0691   | 0.285±0.158,<br><i>p</i> =0.0714   | 0.329±0.157,<br><i>p</i> =0.0367*  | 0.268±0.157,<br><i>p</i> =0.0869   |
| BMI, kg/m <sup>2</sup>         | 0.018±0.015,<br><i>p</i> =0.2368   | 0.049±0.014,<br><i>p</i> =0.0006** | 0.032±0.015,<br><i>p</i> =0.0290*  | 0.050±0.014,<br><i>p</i> =0.0006** | 0.051±0.014,<br><i>p</i> =0.0004** | 0.050±0.014,<br><i>p</i> =0.0005** | 0.048±0.014,<br><i>p</i> =0.0008** |
| Lipid Treatment                | -0.104±0.164,<br><i>p</i> =0.5243  | -0.193±0.168,<br><i>p</i> =0.2507  | -0.126±0.166,<br><i>p</i> =0.4463  | -0.183±0.168,<br><i>p</i> =0.2759  | -0.214±0.166,<br><i>p</i> =0.1986  | -0.212±0.165,<br><i>p</i> =0.2004  | -0.174±0.165,<br><i>p</i> =0.2920  |
| Total Cholesterol, mg/100mL    | 0.003±0.002,<br><i>p</i> =0.3007   | 0.003±0.003,<br><i>p</i> =0.3024   | 0.004±0.002,<br><i>p</i> =0.1449   | 0.003±0.003,<br><i>p</i> =0.3190   | 0.002±0.003,<br><i>p</i> =0.3434   | 0.002±0.002,<br><i>p</i> =0.3591   | 0.003±0.003,<br><i>p</i> =0.2433   |
| HDL Cholesterol mg/100mL       | -0.011±0.005,<br><i>p</i> =0.0307* | -0.012±0.005,<br><i>p</i> =0.0182* | -0.012±0.005,<br><i>p</i> =0.0180* | -0.014±0.005,<br><i>p</i> =0.0057* | -0.013±0.005,<br><i>p</i> =0.0103* | -0.013±0.005,<br><i>p</i> =0.0088* | -0.012±0.005,<br><i>p</i> =0.0206* |
| Triglyceride, mg/100mL         | -0.001±0.001,<br><i>p</i> =0.5507  | -0.001±0.001,<br><i>p</i> =0.6100  | -0.001±0.001,<br><i>p</i> =0.5481  | -0.001±0.001,<br><i>p</i> =0.5230  | -0.001±0.001,<br><i>p</i> =0.6389  | -0.001±0.001,<br><i>p</i> =0.3810  | -0.000±0.001,<br><i>p</i> =0.7233  |
| Antihypertensive Treatment     | 0.142±0.155,<br><i>p</i> =0.3570   | 0.138±0.159,<br><i>p</i> =0.3846   | 0.044±0.157,<br><i>p</i> =0.7823   | 0.143±0.159,<br><i>p</i> =0.3667   | 0.189±0.157,<br><i>p</i> =0.2289   | 0.170±0.156,<br><i>p</i> =0.2774   | 0.155±0.156,<br><i>p</i> =0.3207   |
| Systolic Blood Pressure, mmHg  | -0.004±0.005,<br><i>p</i> =0.3931  | -0.003±0.005,<br><i>p</i> =0.5105  | -0.004±0.005,<br><i>p</i> =0.4553  | -0.003±0.005,<br><i>p</i> =0.6304  | -0.004±0.005,<br><i>p</i> =0.4889  | -0.004±0.005,<br><i>p</i> =0.4658  | -0.004±0.005,<br><i>p</i> =0.4098  |
| Diastolic Blood Pressure, mmHg | -0.008±0.009,<br><i>p</i> =0.3639  | -0.011±0.009,<br><i>p</i> =0.2199  | -0.008±0.009,<br><i>p</i> =0.3719  | -0.011±0.009,<br><i>p</i> =0.2107  | -0.010±0.009,<br><i>p</i> =0.2511  | -0.011±0.009,<br><i>p</i> =0.2286  | -0.008±0.009,<br><i>p</i> =0.3835  |
| Glucose, mg/dL                 | -0.004±0.004,<br><i>p</i> =0.2210  | -0.003±0.004,<br><i>p</i> =0.3850  | -0.004±0.004,<br><i>p</i> =0.3248  | -0.003±0.004,<br><i>p</i> =0.3878  | -0.003±0.004,<br><i>p</i> =0.4526  | -0.003±0.004,<br><i>p</i> =0.4363  | -0.002±0.004,<br><i>p</i> =0.5654  |
| Diabetes                       | 0.512±0.258,<br><i>p</i> =0.0473*  | 0.358±0.261,<br><i>p</i> =0.1693   | 0.366±0.258,<br><i>p</i> =0.1558   | 0.363±0.261,<br><i>p</i> =0.1651   | 0.405±0.262,<br><i>p</i> =0.1222   | 0.372±0.261,<br><i>p</i> =0.1535   | 0.332±0.261,<br><i>p</i> =0.2037   |
| Prevalent CHD                  | 0.439±0.234,<br><i>p</i> =0.0609   | 0.385±0.239,<br><i>p</i> =0.1074   | 0.293±0.237,<br><i>p</i> =0.2166   | 0.403±0.240,<br><i>p</i> =0.0928   | 0.404±0.238,<br><i>p</i> =0.0898   | 0.415±0.237,<br><i>p</i> =0.0793   | 0.397±0.236,<br><i>p</i> =0.0930   |
| Aspirin (3/week)               | -0.036±0.148,<br><i>p</i> =0.8063  | -0.123±0.151,<br><i>p</i> =0.4138  | -0.056±0.149,<br><i>p</i> =0.7102  | -0.130±0.151,<br><i>p</i> =0.3913  | -0.146±0.149,<br><i>p</i> =0.3294  | -0.106±0.149,<br><i>p</i> =0.4778  | -0.123±0.149,<br><i>p</i> =0.4080  |
| Current HRT                    | 0.046±0.298,<br><i>p</i> =0.8767   | 0.119±0.306,<br><i>p</i> =0.6964   | 0.111±0.302,<br><i>p</i> =0.7124   | 0.102±0.306,<br><i>p</i> =0.7398   | 0.188±0.302,<br><i>p</i> =0.5339   | 0.199±0.301,<br><i>p</i> =0.5094   | 0.218±0.301,<br><i>p</i> =0.4685   |
| Smoker                         | -0.118±0.246,<br><i>p</i> =0.6321  | -0.041±0.258,<br><i>p</i> =0.8735  | -0.117±0.252,<br><i>p</i> =0.6411  | 0.117±0.254,<br><i>p</i> =0.6446   | 0.113±0.249,<br><i>p</i> =0.6501   | 0.023±0.248,<br><i>p</i> =0.9247   | 0.078±0.247,<br><i>p</i> =0.7506   |

Associations significant at *p*<0.05 are marked with an \* and those significant after correction for multiple comparisons are marked with \*\*.
